# Supplementary material for: A novel PDPN antagonist peptide CY12-RP2 inhibits melanoma growth via Wnt/β-catenin and modulates the immune cells
Source: PubMed Central journal article supplement (PMC10759609; doi:10.1186/s13046-023-02910-y), 2024-01-02
Supplement: 13046_2023_2910_MOESM1_ESM.pdf [file 13046_2023_2910_MOESM1_ESM.pdf]

## **Supplement**

### **Figures and table included**

A Novel PDPN Antagonist Peptide CY12-RP2 inhibits melanoma growth  
via Wnt/ $\beta$ -catenin and modulates the immune cells

Fig. S1

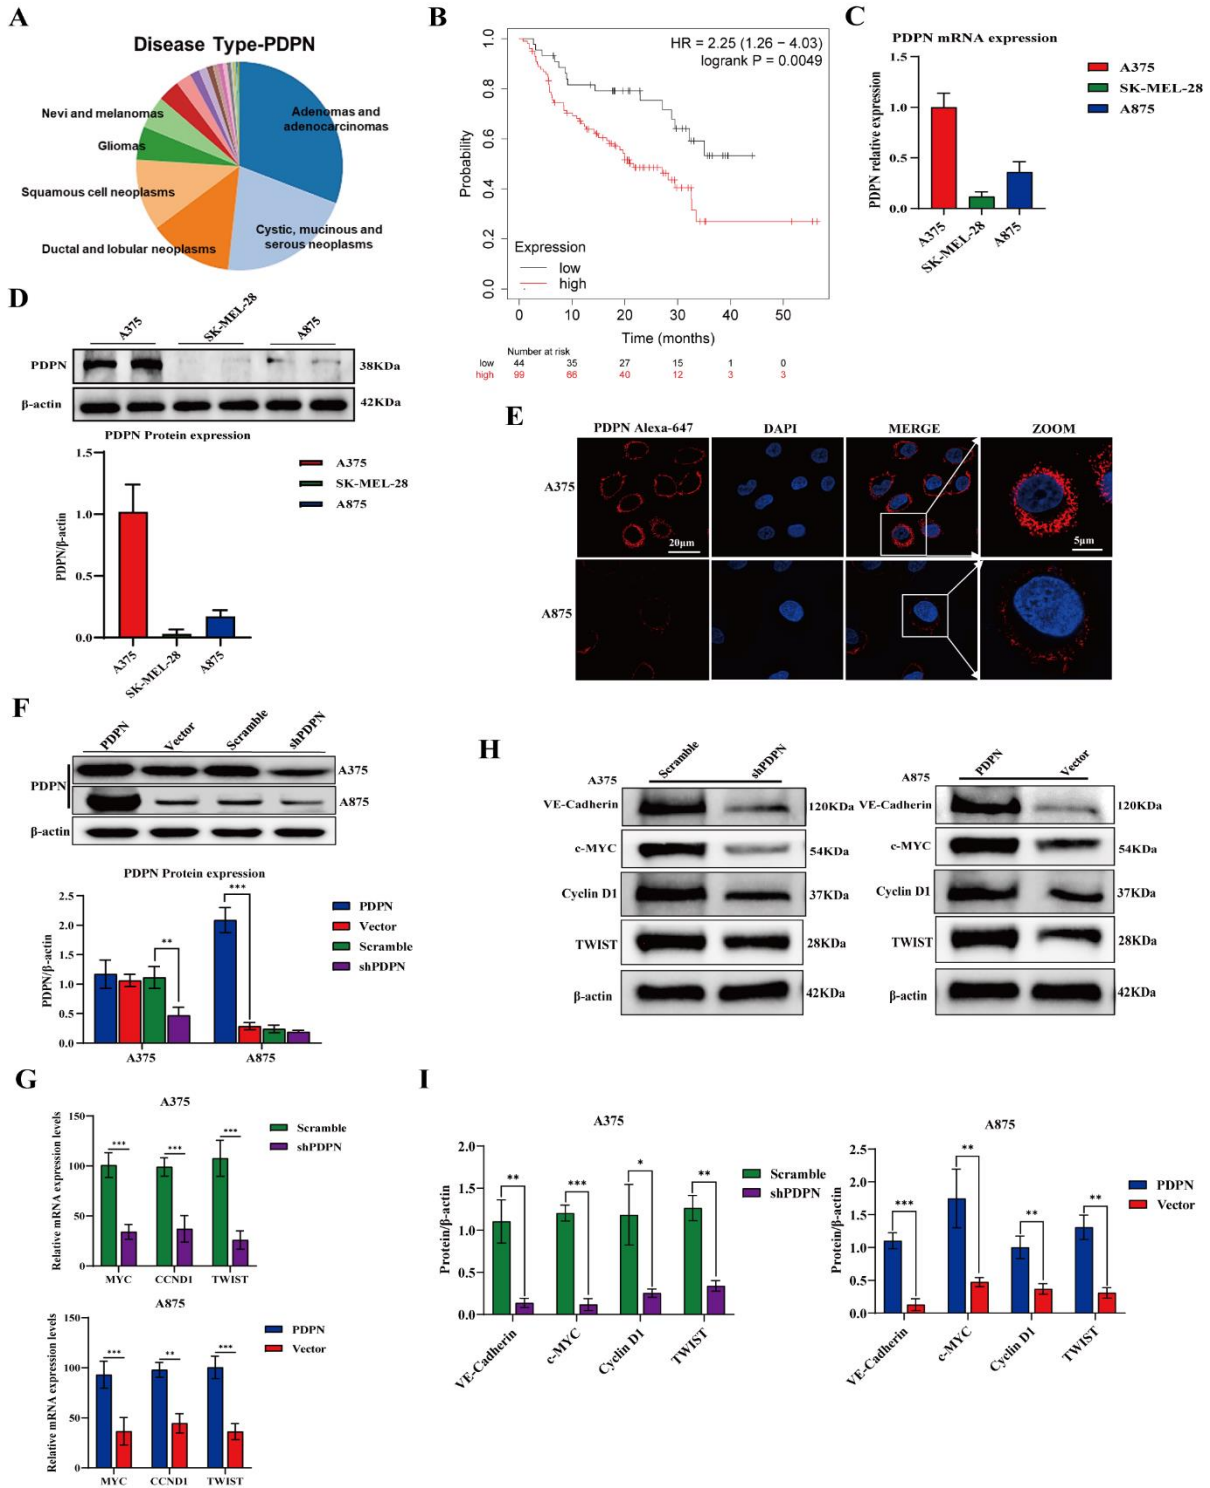

Fig. S2

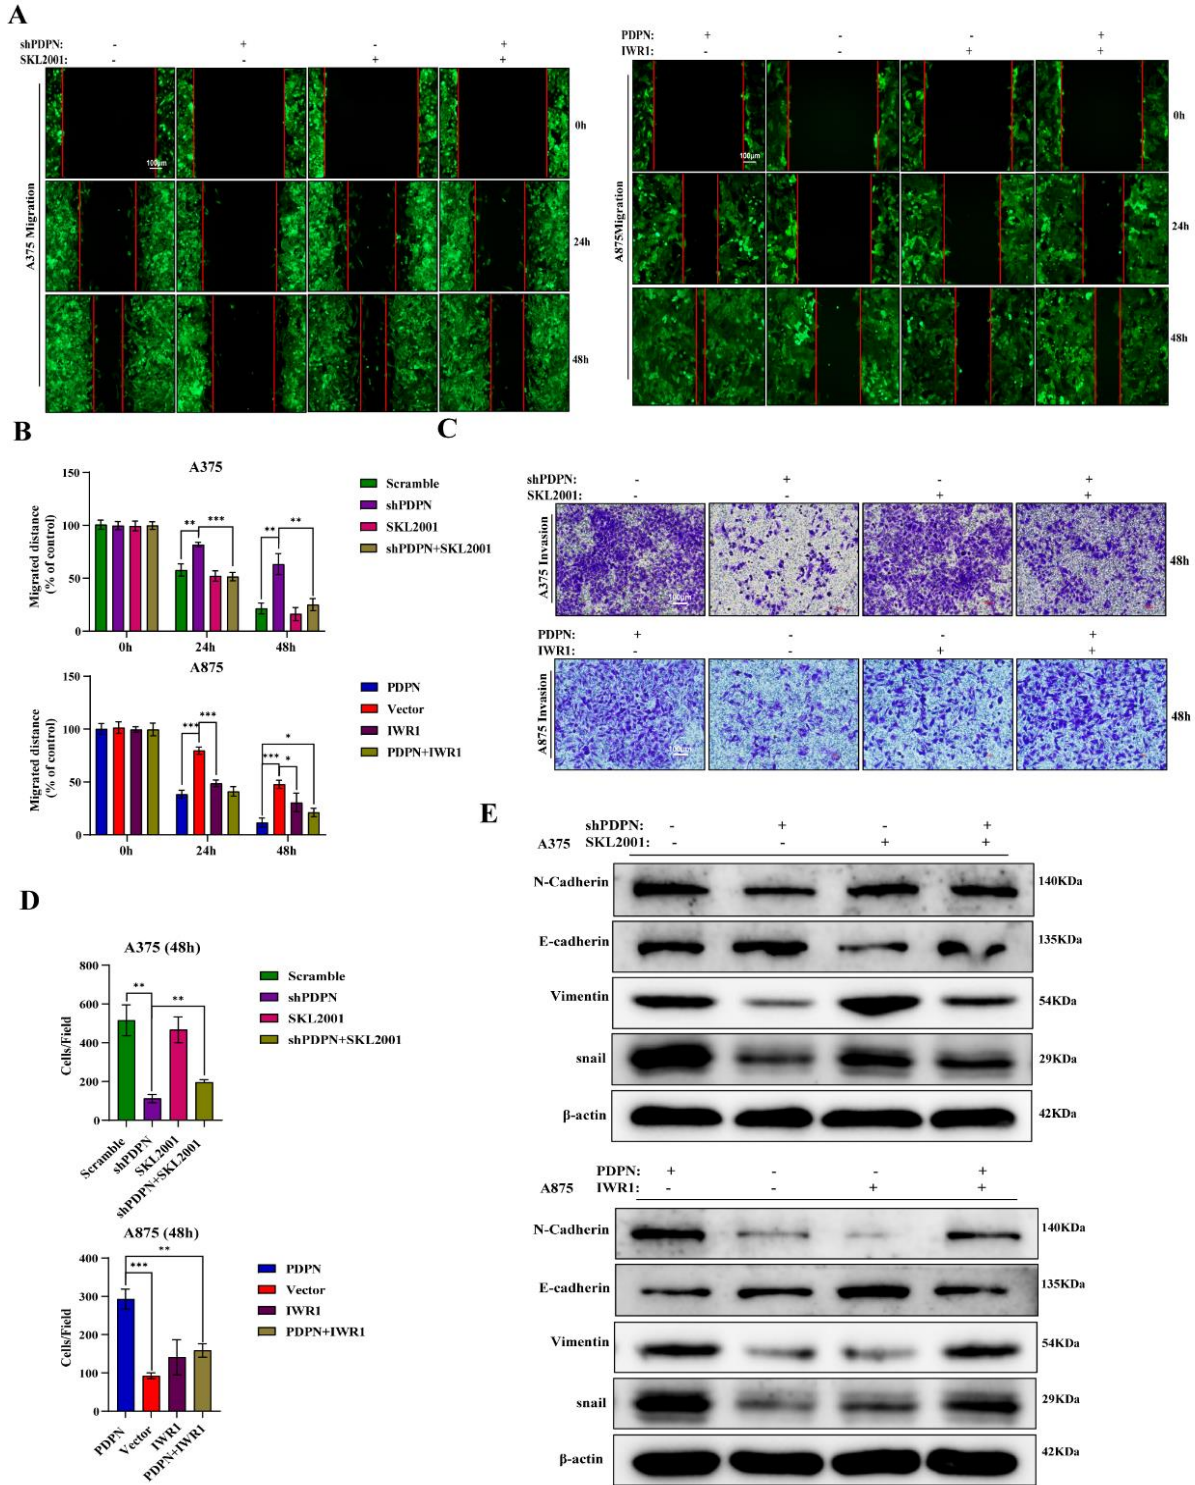

Fig. S3

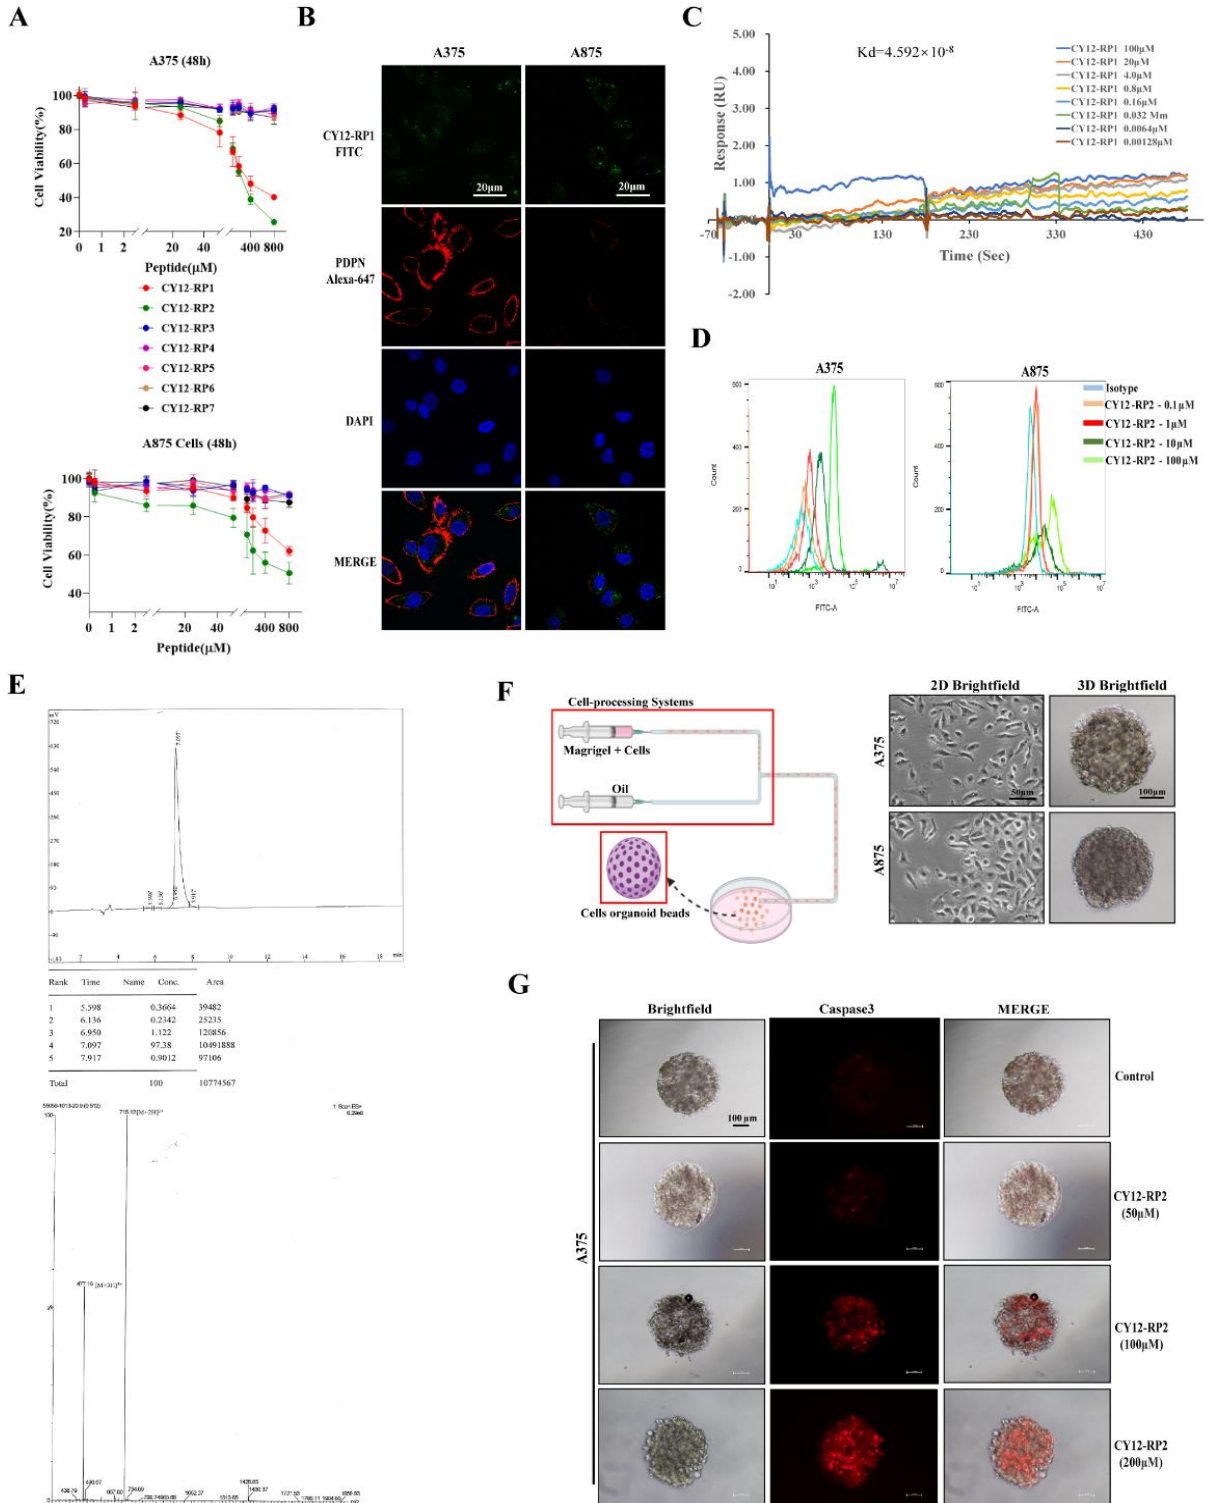

Fig. S4

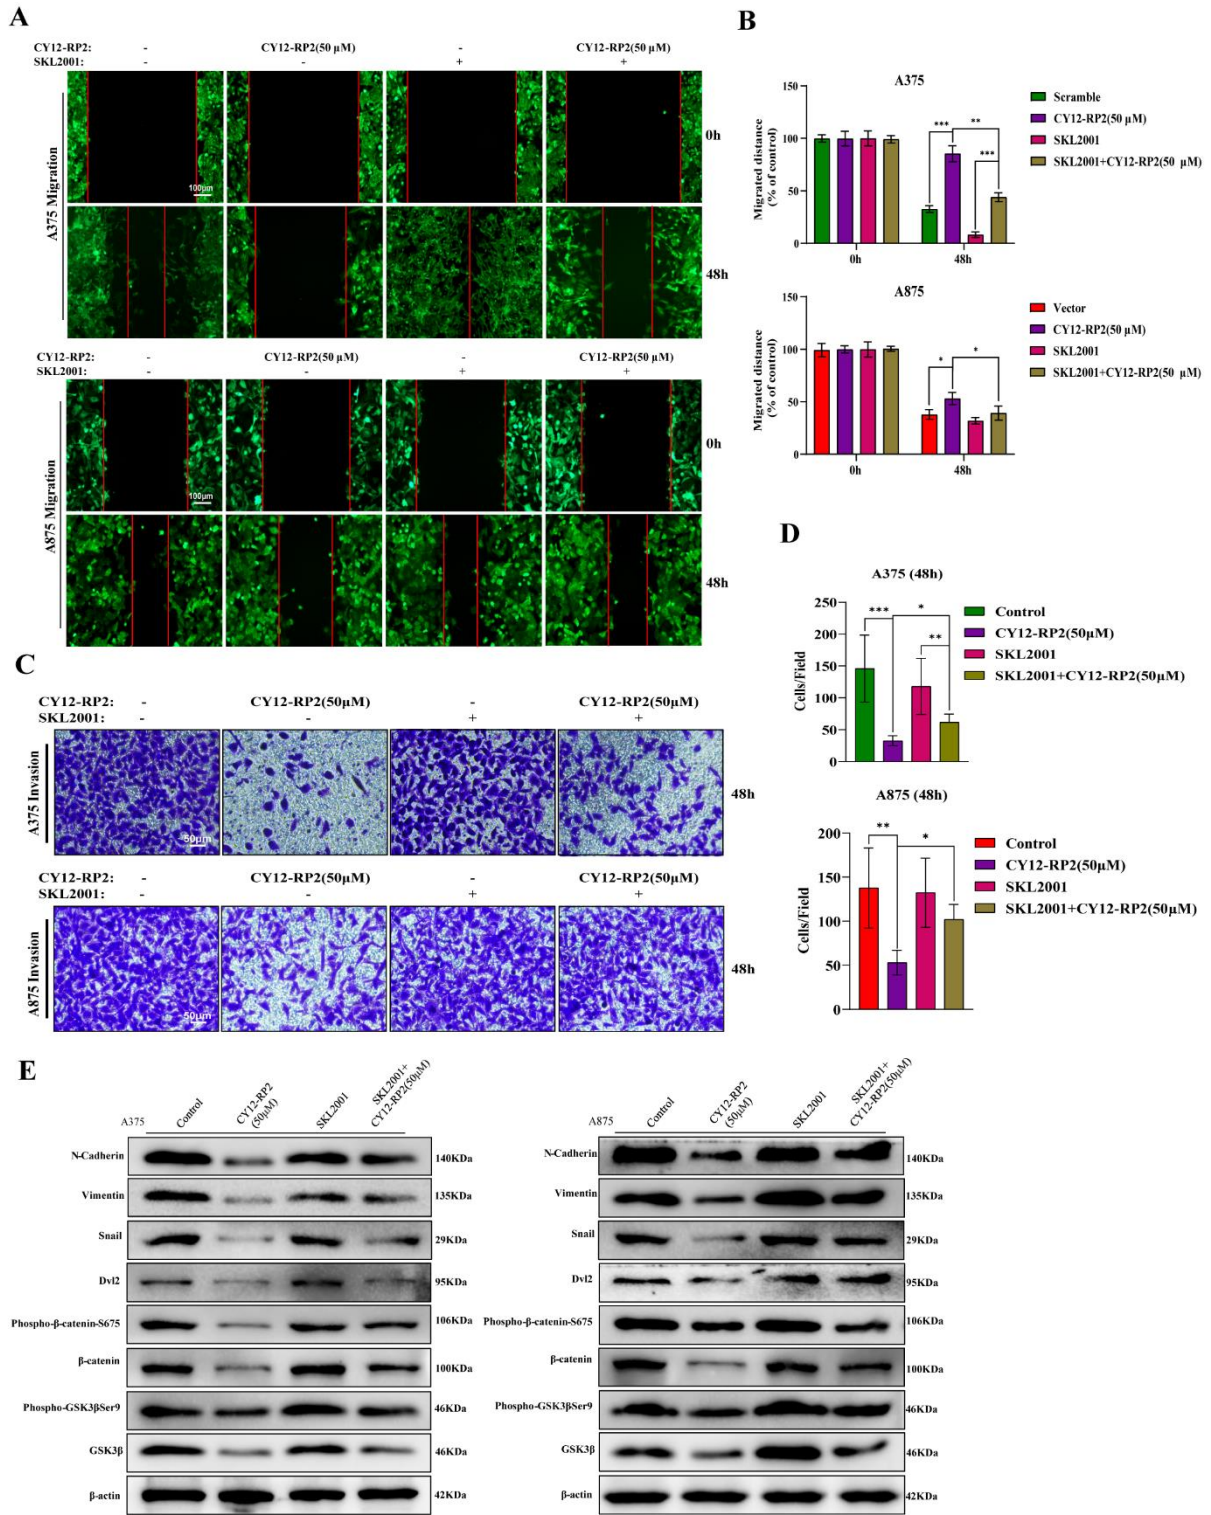

Fig. S5

A

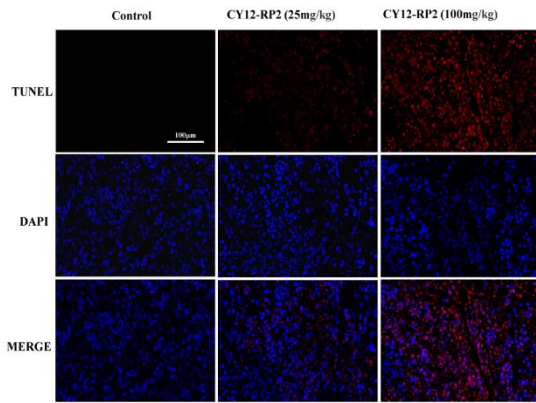

B

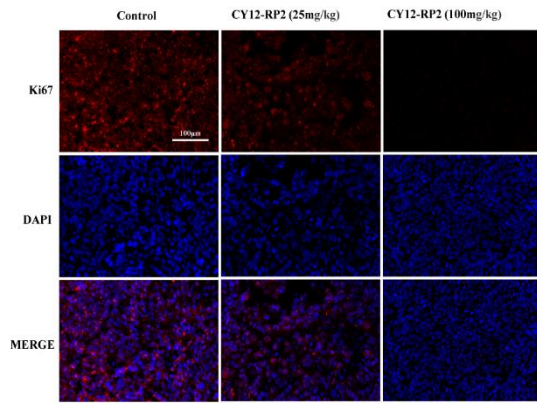

C

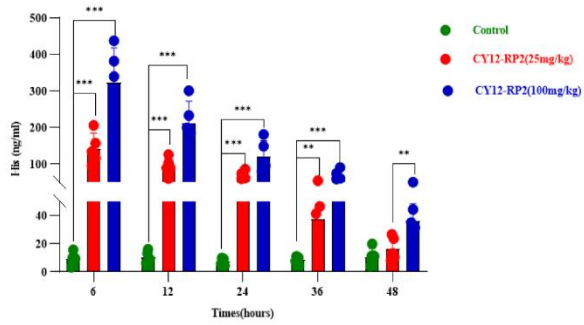

D

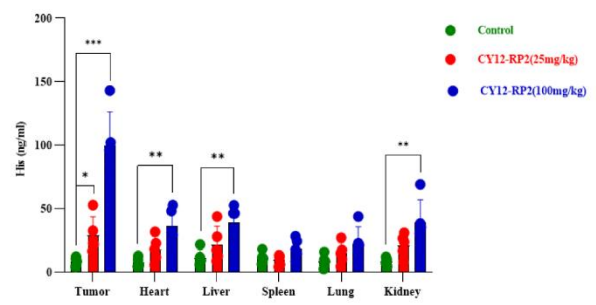

E

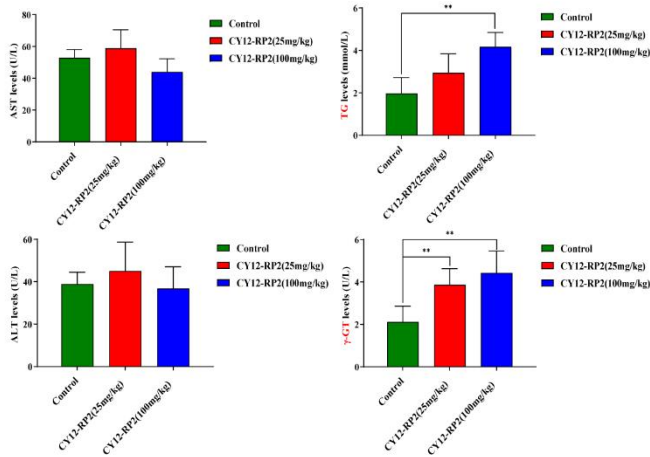

F

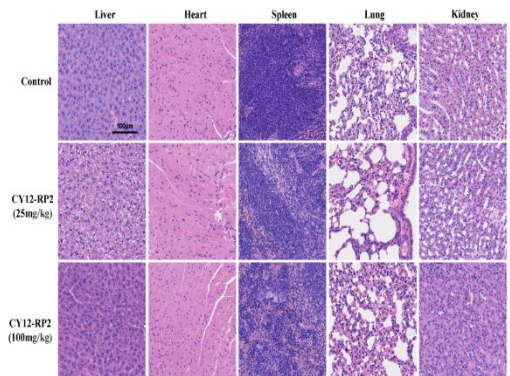

Fig. S6

**A**

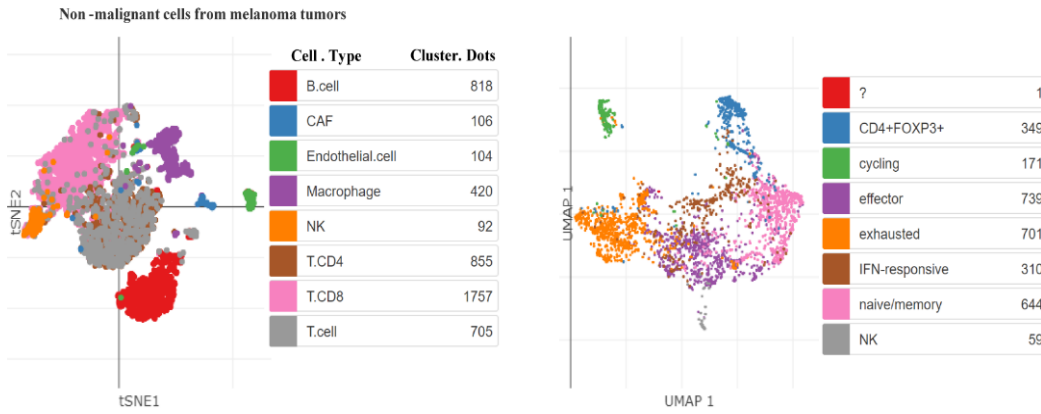

**B**

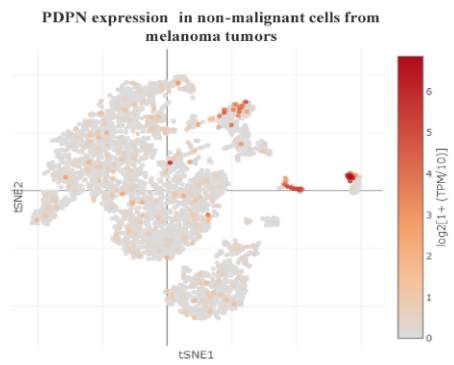

**C**

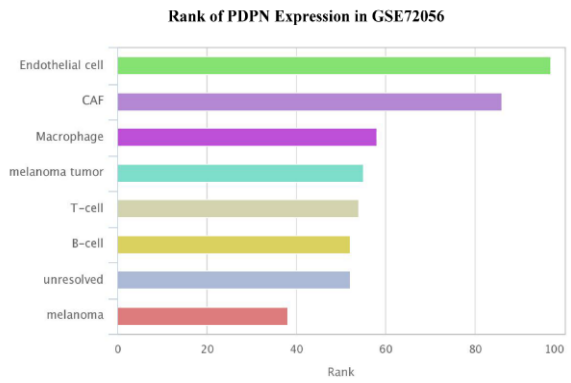

**D**

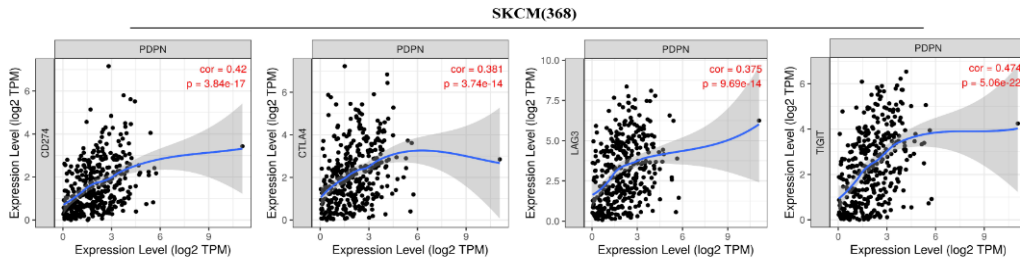

**E**

| Cancer                   | CD8+ T cells | CD4+ T cells | M1 Macrophage | M2 Macrophage | Treg cells | NK cells |
|--------------------------|--------------|--------------|---------------|---------------|------------|----------|
| SKCM (n=471)             | -2.988       | -0.209       | -5.524        | 6.865         | 1.457      | -2.557   |
| SKCM -Metastasis (n=368) | -2.464       | 0.03         | -5.512        | 6.32          | 1.582      | -2.161   |
| SKCM -Primary (n=103)    | -1.488       | -0.05        | -0.563        | 1.691         | -0.768     | -0.468   |

Fig. S7

A

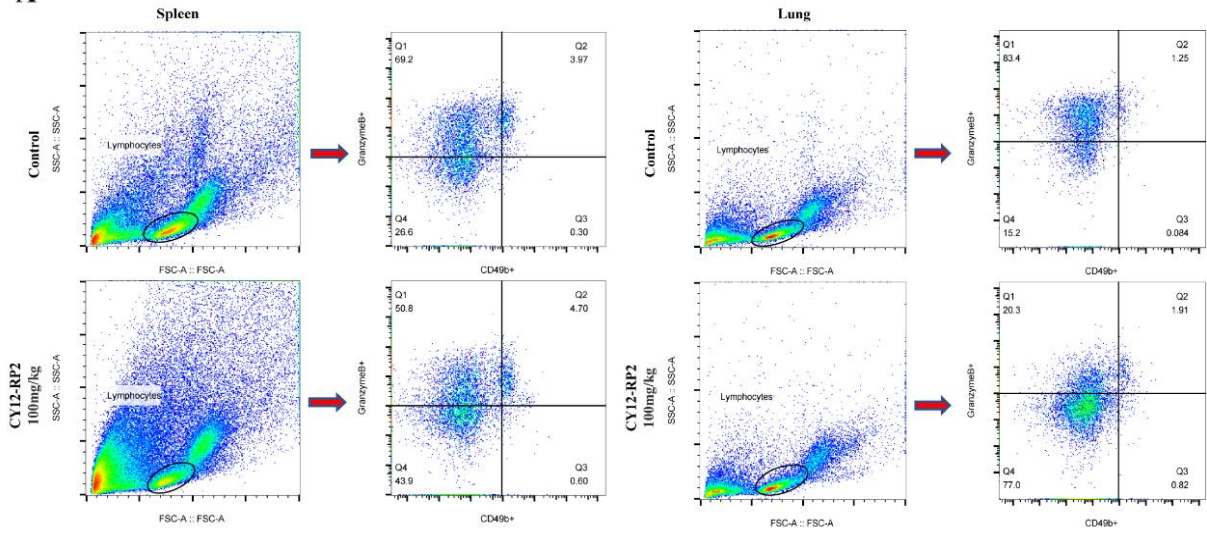

B

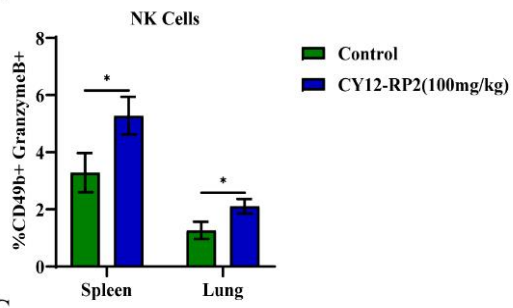

C

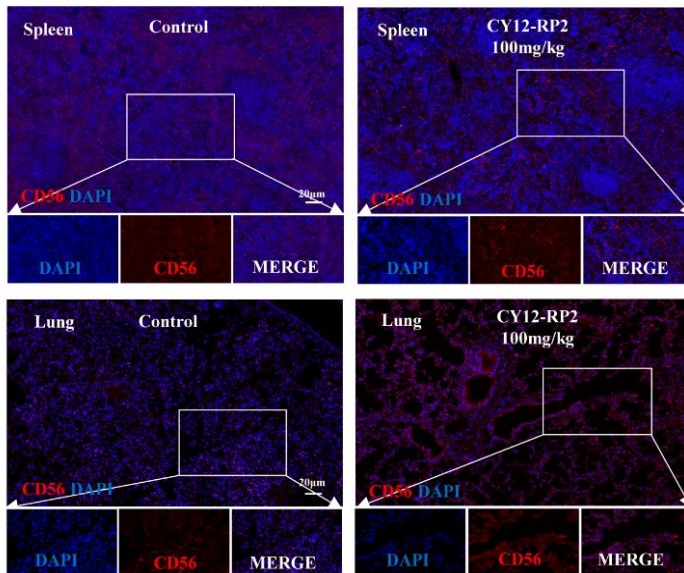



Fig. S8

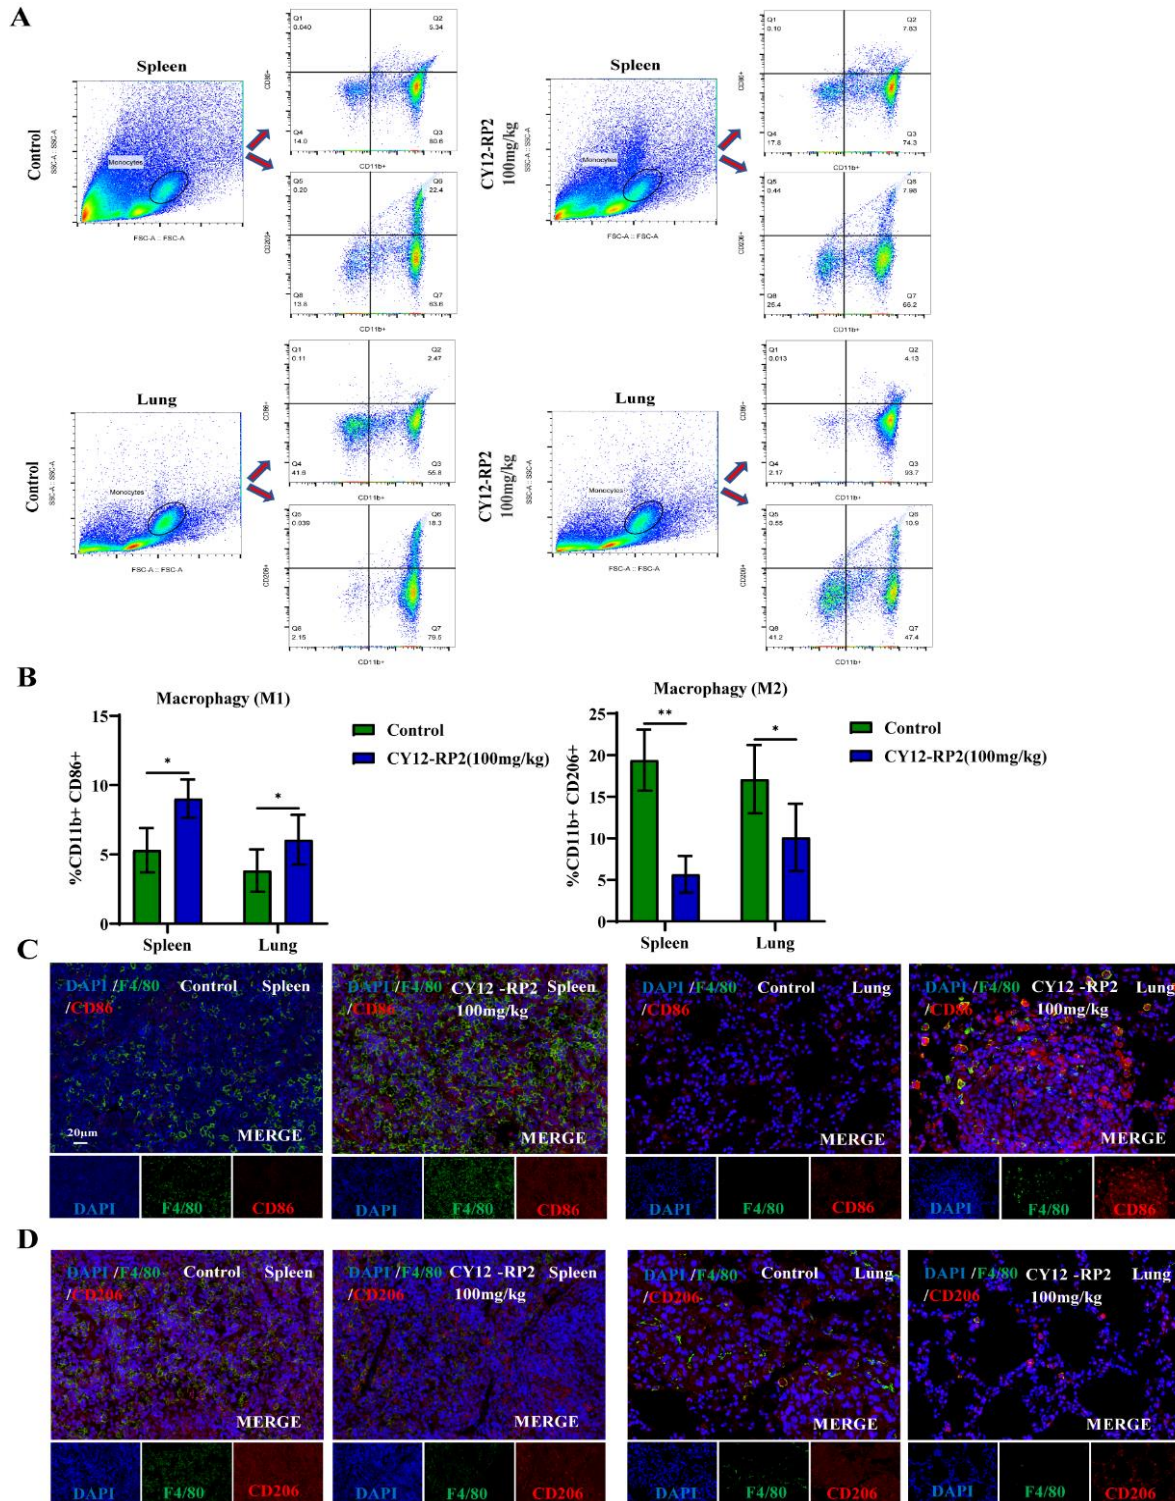

**Fig. S1: PDPN was upregulated in melanoma, which was prognostically relevant to melanoma patient survival**

(A) PDPN was significantly associated with the development of several types of tumors from the TCGA database. (B) Relationship between PDPN expression and prognosis in melanoma. (C) The mRNA expression of PDPN in melanoma cell lines (A375, SK-MEL-28, A875) were measured by real-time RT-PCR. (D) The protein levels of PDPN in melanoma cell lines (A375, SK-MEL-28, A875) were measured by western blot. (E) Immunofluorescence staining of PDPN in melanoma cell lines (A375, A875). The power field scale bar, 20  $\mu\text{m}$  and 5 $\mu\text{m}$ . (F) The interference and overexpression efficiency of PDPN were determined by western blot (F). (G) The mRNA levels of c-MYC, Cyclin D1 and TWIST in A375 cells stably knockdown PDPN or A875 cells with PDPN overexpression. (H, I) Western blot assay was performed on VE-Cadherin, c-MYC, Cyclin D1 and TWIST in the PDPN knockdown A375 cells or in PDPN overexpression A875 cells, respectively (H). Statistical analysis was performed to quantify the relative protein levels (I). Data are presented as mean  $\pm$  SD. \* $p < 0.05$ , \*\* $p < 0.01$ , \*\*\* $p < 0.001$ .

**Fig. S2: The effects of PDPN on migration and invasion could be modulated by SKL2001 and IWR1**

(A, B) Effects of PDPN on the migration ability of melanoma cells was detected by wound healing assays using SKL2001 and IWR1(A). Statistical analysis was performed to determine the migrated distance (B). The power field scale bar, 100  $\mu\text{m}$ . (C, D)

Transwell assays were performed to quantify the modulatory effects of SKL2001 and IWR1 (C). Statistical analysis was performed to evaluate the invasion of cells (D). The power field scale bar, 100  $\mu\text{m}$ . (E) Western blot assays were also performed on EMT-related proteins to identify the effects of SKL2001 and IWR1. Data are presented as mean  $\pm$  SD. \* $p < 0.05$ , \*\* $p < 0.01$ , \*\*\* $p < 0.001$  versus control.

**Fig. S3: The identification and functional analysis of PDPN- binding peptides**

(A) Cell viability of melanoma cell lines (A375, A875) treated with 6 peptides except CY12-RP2 at various concentrations for 48 h. (B) Colocalization of CY12-RP1 and PDPN protein was performed by immunofluorescence in melanoma cell lines (A375, A875). The power field scale bar, 20  $\mu\text{m}$ . (C) SPR assay was performed to quantify the binding activity of CY12-RP1 (100  $\mu\text{M}$ , 20  $\mu\text{M}$ , 4.0  $\mu\text{M}$ , 0.8  $\mu\text{M}$ , 0.16  $\mu\text{M}$ , 0.032  $\mu\text{M}$ , 0.0064  $\mu\text{M}$ , 0.00128  $\mu\text{M}$ ) to PDPN. (D) A representative flow cytometry analysis showed the binding efficiency of CY12-RP2 with PDPN at various concentrations in melanoma cell lines (A375, A875). (E) High-performance liquid chromatography (HPLC) and mass spectrometry (MS) were performed to confirmed the purity of CY12-RP2. (F) Assessing the anti-tumor effects of CY12-RP2 on the viability of melanoma cell spheroids by using cell-processing system, and representative images of 2D cells and 3D cellular sphere were shown. The power field scale bar, 50  $\mu\text{m}$  and 100  $\mu\text{m}$ . (G) Immunofluorescence staining was performed to measure the caspase3 fluorescence intensity of A375 cell spheroids after treating with CY12-RP2. The power field scale bar, 100  $\mu\text{m}$ .

**Fig. S4: The inhibition of cells metastasis and invasion by CY12-RP2 can be reversed by SKL2001**

(A, B) The inhibition of CY12-RP2 on the migration capacity of melanoma cell lines was reversed by SKL2001 (A). Statistical analysis was performed to determine the migrated distance (B). The power field scale bar, 100  $\mu\text{m}$ . (C, D) Effect of CY12-RP2 on the invasive ability of melanoma cell lines were reversed by SKL2001 (C). Statistical analysis was performed to count the invaded cells (D). The power field scale bar, 100  $\mu\text{m}$ . (E) Western blot assay was also performed to detect the proteins related to EMT and Wnt/ $\beta$ -catenin signaling pathway, including N-cadherin, Vimentin, snail, Dvl2, Phospho- $\beta$ -catenin-S675,  $\beta$ -catenin, Phospho-GSK3 $\beta$ -Ser9 and GSK3 $\beta$  by CY12-RP2 with or without SKL2001 (50  $\mu\text{M}$ ). Data are presented as mean  $\pm$  SD. \* $p < 0.05$ , \*\* $p < 0.01$ , \*\*\* $p < 0.001$  versus control.

**Fig. S5: Effects and toxicity of CY12-RP2 in vivo**

(A) TUNEL analysis of apoptosis was conducted on orthotopic xenografts tumor sections using fluorescence staining. The power field scale bar, 100  $\mu\text{m}$ . (B) Fluorescence staining of Ki67 was carried out on orthotopic xenograft tumor sections. The power field scale bar, 100  $\mu\text{m}$ . (C) Serum His-CY12-RP2 levels of the orthotopic xenografts mice treated by various dosage of CY12-RP2 were measured by His-ELISA kit. (D) Tumor, heart, liver, spleen, lung, kidney His-CY12-RP2 levels of the orthotopic xenografts mice treated by various dosage of CY12-RP2 were measured by His-ELISA kit. (E) Serum ALT, AST, TG, and  $\gamma$ -GT levels of the orthotopic xenografts model were measured by ELISA. (F) H&E staining of liver, heart, spleen, lung, and kidney treated

with CY12-RP2 (25 mg/kg, 100 mg/kg) daily for 15 days. The power field scale bar, 100  $\mu$ m. Data are presented as mean  $\pm$  SD. \* $p < 0.05$ , \*\* $p < 0.01$ , \*\*\* $p < 0.001$  versus control.

**Fig. S6: The expression of PDPN is associated with immune infiltration of melanoma tumors**

**(A, B)** Single-cell RNA-seq of melanoma immunotherapy outcomes elucidated the role of PDPN related to the proportion of immune cells in the tumor microenvironment. Immune cell populations from melanoma tumors (A). PDPN expression in immune cells, notably T cells and macrophages (B). **(C)** Rank of PDPN expression in GSE72056 from TCGA database. **(D)** The expression correlation between PDPN and immunoinhibitory in SKCM (skin cutaneous melanoma) was investigated using the TISIDB database. **(E)** The correlation of PDPN expression with immune infiltration level in SKCM was investigated using the TIMER database.

**Fig. S7: CY12-RP2 modifies the population of NK cells in the spleen and lung of mice**

**(A)** Flow cytometric analysis of CD49b<sup>+</sup> and Granzyme B<sup>+</sup> populations in spleen and lung of BALB/C mice with lung metastases. **(B)** Statistical analysis was performed to count the percentage of CD49b<sup>+</sup> and Granzyme B<sup>+</sup> NK cells in the spleen and lung of BALB/C mice with lung metastases. **(C)** Fluorescence imaging of NK cells in the spleen and lung of pulmonary metastasis model stained with CD56 antibody. The power

field scale bar, 20  $\mu\text{m}$ . Data are presented as mean  $\pm$  SD. \* $p < 0.05$ , \*\* $p < 0.01$ , \*\*\* $p < 0.001$  versus control.

**Fig. S8: The effects of CY12-RP2 on the proportion of macrophages (M1 and M2) in the spleen and lung of mice**

(A) Representative flow cytometry images showing the proportion of M1 and M2 macrophages in the spleen and lung of BALB/C mice with lung metastases. (B) Statistical analysis was performed to count the percentage of CD11b<sup>+</sup> CD86<sup>+</sup> M1 macrophages and CD11b<sup>+</sup> CD206<sup>+</sup> M2 macrophages in the spleen and lung of BALB/C mice with lung metastases. (C, D) Proportion of M1 (F4/80<sup>+</sup> CD86<sup>+</sup>) macrophages (C) and M2 (F4/80<sup>+</sup> CD206<sup>+</sup>) macrophages (D) in the spleen and lung of BALB/C mice with lung metastases were detected by representative double immunofluorescence. The power field scale bar, 20  $\mu\text{m}$ . Data are presented as mean  $\pm$  SD. \* $p < 0.05$ , \*\* $p < 0.01$ , \*\*\* $p < 0.001$  versus control.

**Table 1: Antibodies applied for western-blotting, flow cytometry, immunofluorescence and immunohistochemistry analysis**

| <b>antibodies</b>                                | <b>sources</b> | <b>catalog No</b> |
|--------------------------------------------------|----------------|-------------------|
| mouse anti-human pdpn/gp36                       | BioLegend      | 127407            |
| Rabbit anti-human pdpn/gp36                      | ABclonal       | A9242             |
| Rabbit anti-human N-Cadherin                     | ABclonal       | A19083            |
| mouse anti-human E-cadherin                      | ABclonal       | A18135            |
| Rabbit anti-human Vimentin                       | ABclonal       | A11952            |
| Rabbit anti-human snail                          | Abclonal       | A5243             |
| Rabbit anti-human Axin1                          | CST            | #2087             |
| Rabbit anti-human Dvl2                           | CST            | #3224             |
| Rabbit anti-human Phospho- $\beta$ -catenin-S675 | ABclonal       | AP0795            |
| Rabbit anti-human $\beta$ -catenin               | ABclonal       | A0316             |
| Rabbit anti-human Naked1                         | CST            | #2262             |
| Rabbit anti-human Phospho-GSK3 $\beta$ -Ser9     | ABclonal       | AP0039            |
| Rabbit anti-human GSK3 $\beta$                   | ABclonal       | A6164             |
| Rabbit anti-human LEF1                           | ABclonal       | A4473             |
| Rabbit anti-human TCF1/TCF7                      | ABclonal       | A20835            |
| Rabbit anti-human Caspase3                       | ABclonal       | A2156             |
| Rabbit anti-human Caspase9                       | ABclonal       | A2636             |
| Rabbit anti-human BCL2                           | ABclonal       | A111025           |
| Rabbit anti-human Bax                            | ABclonal       | A0207             |
| mouse anti-human $\beta$ -actin                  | ABclonal       | AC004             |
| FITC anti-mouse CD3                              | Biolegend      | 100203            |
| PE-Cyanine7 Anti-Mouse CD4                       | Tonbo          | 60-0042-U025      |
| PerCP-Cyanine5.5 Anti-Mouse CD8a                 | Tonbo          | 65-0081-U025      |
| APC anti-mouse CD25                              | Biolegend      | 102011            |
| PE Anti-Mouse Foxp3                              | Tonbo          | 50-5773-U025      |
| APC/Cyanine7 anti-mouse CD49b                    | Biolegend      | 108919            |
| PE anti-human/mouse Granzyme B                   | Biolegend      | 372207            |
| APC anti-mouse/human CD11b                       | Biolegend      | 101211            |
| FITC anti-mouse CD86                             | Biolegend      | 105006            |
| PE anti-mouse CD206                              | Biolegend      | 141705            |
